# Supplementary material for: Ecology and genomics of an important crop wild relative as a prelude to agricultural innovation
Source: PubMed Central journal article supplement (PMC5811434; doi:10.1038/s41467-018-02867-z), 2018-02-13
Supplement: 41467_2018_2867_MOESM1_ESM.pdf [file 41467_2018_2867_MOESM1_ESM.pdf]

**Supplementary Table 1.** ANOVA of differences among sites in heating degree days, following the Chen et al (2012) mode both assuming either no vernalization or vernalization.

---

| <b>Model without vernalization</b> |           |           |           |          |                      |
|------------------------------------|-----------|-----------|-----------|----------|----------------------|
| <b>Source</b>                      | <b>SS</b> | <b>df</b> | <b>MS</b> | <b>F</b> | <b>Prob&gt;F</b>     |
| <b>Thermal Units</b>               | 5746.2    | 16        | 359.139   | 26.77    | 4.16e <sup>-80</sup> |
| <b>Error</b>                       | 247468.6  | 18445     | 13.417    |          |                      |
| <b>Total</b>                       | 253214.8  | 18461     |           |          |                      |

---

| <b>Model with vernalization</b> |           |           |           |          |                      |
|---------------------------------|-----------|-----------|-----------|----------|----------------------|
| <b>Source</b>                   | <b>SS</b> | <b>df</b> | <b>MS</b> | <b>F</b> | <b>Prob&gt;F</b>     |
| <b>Thermal Units</b>            | 2653.5    | 16        | 165.841   | 6.62     | 3.02e <sup>-15</sup> |
| <b>Error</b>                    | 462193.3  | 18445     | 25.058    |          |                      |
| <b>Total</b>                    | 464846.8  | 18461     |           |          |                      |

---

SS, sum of squared

df, degrees of freedom

MS, mean squared

F, F statistic

Prob>F, probability value associated with F.

**Supplementary Table 2.** Summary statistics on samples sequenced and polymorphisms.

|                                                                                   | <b>All</b> | <b><i>Cicer arietinum</i></b> | <b><i>Cicer reticulat</i></b> | <b><i>Cicer echinospermum</i></b> |
|-----------------------------------------------------------------------------------|------------|-------------------------------|-------------------------------|-----------------------------------|
| <b>Number of Samples Sequenced</b>                                                | 1366*      | 124                           | 774                           | 342                               |
| <b>Number of Samples Retained</b>                                                 | 1064**     | 56                            | 656                           | 306                               |
| <b>Number of loci polymorphic within each set</b>                                 | 148,136    | 25,036                        | 136,638                       | 88,976                            |
| <b>Number of loci polymorphic within each set for population genetic analysis</b> | 16,845     | 11,277                        | 16,845                        | 21,088                            |

\*Includes 126 *Cicer bijugum* samples

\*\*Includes 46 *Cicer bijugum* samples

**Supplementary Table 3.** Admixture proportions for up to 4 migration events in the fitted accession tree (Figure 4b)

| <b>Migration event proportion</b> | <b>Admixture <math>\pm</math> standard error</b> | <b><i>P</i>-value</b> |
|-----------------------------------|--------------------------------------------------|-----------------------|
| Kilavuz!Oyali                     | 17.1 $\pm$ 1.3%                                  | $<2.23e^{-308}$       |
| Kilavuz!Kesentas                  | 11.9 $\pm$ 1.6%                                  | $6.19e^{-13}$         |
| Kilavuz!(Sirnak,CudiA,CudiB)      | 6.3 $\pm$ 1.0%                                   | $1.39e^{-10}$         |
| Kilavuz!Bari2                     | 3.8 $\pm$ 0.01%                                  | $4.47e^{-09}$         |

P-value, probability value.

**Supplementary Table 4.** Population genetic statistics across 16,845 SNPs.

| Population  | Species              | Hs      | Tajima D     | PI                   |
|-------------|----------------------|---------|--------------|----------------------|
| Cultivated  | <i>arietinum</i>     | 0.08927 | -0.757653888 | 2.00e <sup>-06</sup> |
| Baristepe 1 | <i>reticulatum</i>   | 0.03978 | -0.486651002 | 4.00e <sup>-06</sup> |
| Baristepe 2 | <i>reticulatum</i>   | 0.0979  | -0.018507921 | 5.13e <sup>-06</sup> |
| Baristepe 3 | <i>reticulatum</i>   | 0.0968  | -0.102281894 | 5.06e <sup>-06</sup> |
| Besevler    | <i>reticulatum</i>   | 0.09368 | -0.071017043 | 6.48e <sup>-06</sup> |
| Cudi A      | <i>reticulatum</i>   | 0.07654 | -0.030666944 | 5.30e <sup>-06</sup> |
| Cudi B      | <i>reticulatum</i>   | 0.05777 | 0.085340858  | 6.26e <sup>-06</sup> |
| Dereci      | <i>reticulatum</i>   | 0.08622 | 0.055901881  | 6.37e <sup>-06</sup> |
| Egil        | <i>reticulatum</i>   | 0.09374 | -0.113811878 | 6.22e <sup>-06</sup> |
| Kalkan      | <i>reticulatum</i>   | 0.08514 | 0.074683336  | 7.71e <sup>-06</sup> |
| Kayatepe    | <i>reticulatum</i>   | 0.08221 | -0.221334851 | 5.18e <sup>-06</sup> |
| Kesentas    | <i>reticulatum</i>   | 0.02709 | -0.811521326 | 2.29e <sup>-06</sup> |
| Oyali       | <i>reticulatum</i>   | 0.07254 | -0.187121316 | 4.86e <sup>-06</sup> |
| Sarikaya    | <i>reticulatum</i>   | 0.07249 | -0.321330115 | 5.57e <sup>-06</sup> |
| Savur       | <i>reticulatum</i>   | 0.07954 | -0.100459006 | 7.02e <sup>-06</sup> |
| Sirnak      | <i>reticulatum</i>   | 0.00924 | -1.295944461 | 9.34e <sup>-07</sup> |
| Cermik      | <i>echinospermum</i> | 0.0955  | -0.140202886 | 5.31e <sup>-06</sup> |
| Destek      | <i>echinospermum</i> | 0.10344 | -0.170023083 | 2.82e <sup>-06</sup> |
| Guvenli     | <i>echinospermum</i> | 0.03137 | -0.915508952 | 2.21e <sup>-06</sup> |
| Gunasan     | <i>echinospermum</i> | 0.08255 | 0.296570175  | 6.86e <sup>-06</sup> |
| Karabachi   | <i>echinospermum</i> | 0.10629 | -0.278990661 | 4.12e <sup>-06</sup> |
| S2Drd       | <i>echinospermum</i> | 0.09404 | 0.080038862  | 6.54e <sup>-06</sup> |
| Ortanca     | <i>echinospermum</i> | 0.08558 | -0.365004572 | 3.77e <sup>-06</sup> |

Hs, average gene diversity.

PI, pairwise nucleotide diversity.

**Supplementary Table 5a.** Results of mixed-model ANOVA on Euclidean distance from seed-soil color comparing soil category (i.e., Native vs. Foreign), species (Species), and population nested within species (Population). Genotype was treated as a random effect.

| Source                     | Df      | F      | P-value |
|----------------------------|---------|--------|---------|
| Soil Category              | 1, 209  | 0.45   | 0.5046  |
| Species                    | 2, 209  | 283.97 | <0.0001 |
| Soil Category X Species    | 2, 209  | 2.71   | 0.0686  |
| Population                 | 16, 209 | 11.75  | <0.0001 |
| Soil Category X Population | 16, 209 | 3.76   | <0.0001 |

**Supplementary Table 5b.** Results of one-way ANOVAs performed for each population testing whether seed-soil color distances for a given population differs from soil from different populations of the same species.

| Seed Population        | df      | F     | P-value |
|------------------------|---------|-------|---------|
| <b>Ech populations</b> |         |       |         |
| Cermik                 | 4, 20   | 1.12  | 0.3757  |
| Gunasan                | 4, 12   | 27.27 | <0.0001 |
| Karabace               | 4, 48   | 26.00 | <0.0001 |
| Ortanca                | 4, 8    | 11.05 | 0.0024  |
| <b>Ret populations</b> |         |       |         |
| Bari1                  | 13, 104 | 9.53  | <0.0001 |
| Bari2                  | 13, 91  | 1.80  | 0.0554  |
| Bari3                  | 13, 247 | 18.08 | <0.0001 |
| Besev                  | 13, 91  | 2.00  | 0.0296  |
| Cudi                   | 13, 455 | 38.91 | <0.0001 |
| Derici                 | 13, 117 | 1.99  | 0.0275  |
| Egil                   | 13, 78  | 1.25  | 0.2619  |
| Kalkan                 | 13, 65  | 8.22  | <0.0001 |
| Kayatepe               | 13, 78  | 9.78  | <0.0001 |
| Kesentas               | 13, 130 | 11.88 | <0.0001 |
| Oyali                  | 13, 130 | 5.11  | <0.0001 |
| Sarikaya               | 13, 104 | 10.99 | <0.0001 |
| Savur                  | 13, 13  | 73.35 | <0.0001 |
| Sirnak                 | 13, 442 | 57.57 | <0.0001 |

df, degrees of freedom.

Custom F-test; F, F value.

P-value, probability value

**Supplementary Table 6.** Fraction of transpirable soil water (FTWS) thresholds of wild and cultivated *Cicer* accessions. FTSW threshold is the inflection point at transpiration declines upon exposure to progressive soil water deficit.

| Genotype    | FTSW threshold | Approximate SE | Approximate %95 | Confidence Limits |
|-------------|----------------|----------------|-----------------|-------------------|
| BARI 1 092  | 0.425          | 0.008          | 0.407           | 0.443             |
| BARI2 072N2 | 0.541          | 0.013          | 0.514           | 0.567             |
| BARI3 072C  | 0.538          | 0.014          | 0.510           | 0.567             |
| BARI3 100   | 0.572          | 0.013          | 0.546           | 0.599             |
| BARI3 106D  | 0.530          | 0.009          | 0.512           | 0.548             |
| BESEV 075   | 0.495          | 0.011          | 0.473           | 0.518             |
| BESEV 079   | 0.461          | 0.009          | 0.441           | 0.480             |
| ÇAĞATAY     | 0.494          | 0.012          | 0.469           | 0.52              |
| ÇERMİK 075  | 0.496          | 0.010          | 0.476           | 0.517             |
| CUDI A 152  | 0.564          | 0.012          | 0.539           | 0.590             |
| CUDI B 022C | 0.547          | 0.013          | 0.520           | 0.573             |
| DEREİ 070   | 0.504          | 0.010          | 0.482           | 0.525             |
| DEREİ 072   | 0.505          | 0.013          | 0.477           | 0.532             |
| DESTE 080   | 0.430          | 0.013          | 0.402           | 0.457             |
| DİKBAŞ      | 0.558          | 0.014          | 0.529           | 0.587             |
| DİYAR 95    | 0.409          | 0.020          | 0.368           | 0.449             |
| EĞİL 065    | 0.582          | 0.009          | 0.563           | 0.601             |
| EĞİL 073    | 0.554          | 0.010          | 0.530           | 0.578             |
| GÖKÇE       | 0.449          | 0.013          | 0.422           | 0.476             |
| GUNAS 062   | 0.469          | 0.014          | 0.441           | 0.496             |
| KALKA 064   | 0.496          | 0.011          | 0.473           | 0.518             |
| KARAB 092   | 0.601          | 0.015          | 0.571           | 0.630             |
| KAYAT 077   | 0.577          | 0.010          | 0.556           | 0.597             |
| KESEN 075   | 0.480          | 0.011          | 0.456           | 0.503             |
| ORTAN 066   | 0.553          | 0.017          | 0.519           | 0.586             |
| OYALI 084   | 0.502          | 0.009          | 0.483           | 0.522             |
| S2DRD 065   | 0.470          | 0.014          | 0.442           | 0.498             |
| SARIK 067   | 0.498          | 0.010          | 0.476           | 0.519             |
| SAVUR 063   | 0.467          | 0.012          | 0.442           | 0.492             |
| SIRNAK 060  | 0.533          | 0.009          | 0.513           | 0.553             |

SE: standard error of the mean.

**Supplementary Table 7.** Transpiration rate (TR) and residual TR values of genotypes at high VPD conditions.

| Genotype    | VPD1  |             | VPD2  |             |
|-------------|-------|-------------|-------|-------------|
|             | TR    | Residual TR | TR    | Residual TR |
| BARİ1-092   | 0.623 | 1.249       | 0.603 | 1.355       |
| BARİ2-072N2 | 0.474 | 7.916       | 0.504 | -0.725      |
| BARİ3-072C  | 0.588 | 5.808       | 0.528 | -2.468      |
| BARİ3-100   | 0.471 | 1.584       | 0.543 | 4.111       |
| BARİ3-106D  | 0.429 | -3.496      | 0.509 | -2.618      |
| BESEV-075   | 0.502 | 3.835       | 0.632 | 5.401       |
| BESEV-079   | 0.498 | 1.300       | 0.540 | -0.218      |
| CERMİK-075  | 0.552 | 1.649       | 0.626 | 4.899       |
| CUDİA-152   | 0.513 | -0.489      | 0.507 | -0.754      |
| CudiB-022C  | 0.386 | -2.432      | 0.459 | -2.503      |
| ÇAĞATAY     | 0.480 | -0.396      | 0.476 | 2.472       |
| DEREİ-070   | 0.455 | -2.566      | 0.486 | -2.760      |
| DEREİ-072   | 0.334 | -8.968      | 0.458 | -2.047      |
| DESTE-080   | 0.991 | 6.766       | 0.799 | 0.899       |
| DİKBAŞ      | 0.498 | -2.606      | 0.532 | -5.526      |
| DİYAR-95    | 0.607 | 5.904       | 0.721 | 15.325      |
| EGİL-065    | 0.448 | -0.368      | 0.504 | -0.057      |
| EGİL-073    | 0.468 | -4.435      | 0.613 | 3.960       |
| GÖKÇE       | 0.412 | -1.416      | 0.317 | -10.799     |
| GUNAS-062   | 0.549 | -3.516      | 0.545 | -3.835      |
| KALKA-064   | 0.844 | 2.354       | 0.471 | -2.428      |
| KARAB-092   | 0.649 | 8.592       | 0.503 | -0.794      |
| KAYAT-077   | 0.463 | 2.857       | 0.524 | -2.098      |
| KESEN-075   | 0.367 | -6.292      | 0.565 | 0.245       |
| ORTAN-066   | 0.462 | -3.060      | 0.786 | 4.242       |
| OYALİ-084   | 0.491 | -0.170      | 0.547 | 0.507       |
| S2DRD-065   | 0.477 | -5.786      | 0.497 | -5.383      |
| SARİK-067   | 0.486 | -1.755      | 0.522 | -0.249      |
| SAVUR-063   | 0.518 | -2.507      | 0.703 | 0.359       |
| SİRNAK-060  | 1.101 | 0.131       | 0.789 | 1.683       |

VPD, vapor pressure deficit.

**Supplementary Table 8a.** MANOVA of Mineral Nutrient content in seeds. Wilks' Lambda and Pillai's Trace test statistics from MANOVAs using all 20 elements (All data) and the 16 elements (i.e., without Boron, Aluminum, Arsenic, and Selenium; Subset) testing species and population/origin nested within species effects. Separate analyses were performed for population and origin effects.

| Source                     | df          | Statistic value | F-Value | P-value |
|----------------------------|-------------|-----------------|---------|---------|
| <b>BASED ON POPULATION</b> |             |                 |         |         |
| All data                   |             |                 |         |         |
| Species                    |             |                 |         |         |
| Wilks' Lambda              | 40, 506     | 0.2316          | 13.63   | <0.0001 |
| Pillai's Trace             | 40, 508     | 0.9562          | 11.63   | <0.0001 |
| Population(Species)        |             |                 |         |         |
| Wilks' Lambda              | 200, 2296.5 | 0.0693          | 3.97    | <0.0001 |
| Pillai's Trace             | 200, 2620   | 2.1743          | 3.64    | <0.0001 |
| Subset 16 elements         |             |                 |         |         |
| Species                    |             |                 |         |         |
| Wilks' Lambda              | 32, 514     | 0.3775          | 10.08   | <0.0001 |
| Pillai's Trace             | 32, 516     | 0.7382          | 9.43    | <0.0001 |
| Population(Species)        |             |                 |         |         |
| Wilks' Lambda              | 160, 2213.9 | 0.1135          | 4.02    | <0.0001 |
| Pillai's Trace             | 160, 2660   | 1.8292          | 3.72    | <0.0001 |
| <b>BASED ON ORIGIN</b>     |             |                 |         |         |
| All data                   |             |                 |         |         |
| Species                    |             |                 |         |         |
| Wilks' Lambda              | 40, 486     | 0.1561          | 18.60   | <0.0001 |
| Pillai's Trace             | 40, 488     | 1.1872          | 17.82   | <0.0001 |
| Population(Species)        |             |                 |         |         |
| Wilks' Lambda              | 420, 3596.8 | 0.0149          | 2.88    | <0.0001 |
| Pillai's Trace             | 420, 5240   | 3.3820          | 2.54    | <0.0001 |
| Subset 16 elements         |             |                 |         |         |
| Species                    |             |                 |         |         |
| Wilks' Lambda              | 32, 494     | 0.2758          | 13.96   | <0.0001 |
| Pillai's Trace             | 32, 496     | 0.9412          | 13.78   | <0.0001 |
| Population(Species)        |             |                 |         |         |
| Wilks' Lambda              | 336, 3205   | 0.0303          | 3.00    | <0.0001 |
| Pillai's Trace             | 336, 4192   | 2.8684          | 2.73    | <0.0001 |

df, degrees of freedom  
P, probability



**Supplementary Table 8b.** MANOVA to assess differences in seed mineral nutrition based on population from which seeds were collected. Wilks' Lambda and Pillai's Trace test statistics from MANOVAs performed within each species testing for population/origin effects on the seed elements. Separate analyses were performed for population and origin.

| Source                     | df          | Statistic value | F-Value | P-value |
|----------------------------|-------------|-----------------|---------|---------|
| <b>BASED ON POPULATION</b> |             |                 |         |         |
| All data                   |             |                 |         |         |
| Ech Species                |             |                 |         |         |
| Wilks' Lambda              | 40, 90      | 0.157           | 3.43    | <0.0001 |
| Pillai's Trace             | 40, 92      | 1.190           | 3.38    | <0.0001 |
| Ret Species                |             |                 |         |         |
| Wilks' Lambda              | 160, 1276.4 | 0.020           | 5.52    | <0.0001 |
| Pillai's Trace             | 160, 1408   | 2.819           | 4.79    | <0.0001 |
| Subset 16 elements         |             |                 |         |         |
| Ech Species                |             |                 |         |         |
| Wilks' Lambda              | 32, 98      | 0.185           | 4.05    | <0.0001 |
| Pillai's Trace             | 32, 100     | 1.127           | 4.04    | <0.0001 |
| Ret Species                |             |                 |         |         |
| Wilks' Lambda              | 128, 1260.2 | 0.045           | 5.30    | <0.0001 |
| Pillai's Trace             | 128, 1440   | 2.380           | 4.76    | <0.0001 |
| <b>BASED ON Origin</b>     |             |                 |         |         |
| All data                   |             |                 |         |         |
| Ech Species                |             |                 |         |         |
| Wilks' Lambda              | 100, 209.6  | 0.024           | 2.42    | <0.0001 |
| Pillai's Trace             | 100, 230    | 2.501           | 2.30    | <0.0001 |
| Ret Species                |             |                 |         |         |
| Wilks' Lambda              | 320, 2079.7 | 0.003           | 3.89    | <0.0001 |
| Pillai's Trace             | 320, 2832   | 4.247           | 3.20    | <0.0001 |
| Subset 16 elements         |             |                 |         |         |
| Ech Species                |             |                 |         |         |
| Wilks' Lambda              | 80, 225.8   | 0.037           | 2.78    | <0.0001 |
| Pillai's Trace             | 80, 250     | 2.276           | 2.61    | <0.0001 |
| Ret Species                |             |                 |         |         |
| Wilks' Lambda              | 256, 1925.1 | 0.008           | 4.00    | <0.0001 |
| Pillai's Trace             | 256, 2896   | 3.627           | 3.32    | <0.0001 |

df, degrees of freedom

P, probability

**Supplementary Table 9a. *Helicoverpa armigera* detached leaf assay.**

| Accession         | Species                      | Remark                | Damage Rating (1-9) |            | Larval Survival (%) |           | Larval Weight (g) |             | Host suitability index |             |
|-------------------|------------------------------|-----------------------|---------------------|------------|---------------------|-----------|-------------------|-------------|------------------------|-------------|
|                   |                              |                       | 30 DAE              | 60 DAE     | 30 DAE              | 60 DAE    | 30 DAE            | 60 DAE      | 30 DAE                 | 60 DAE      |
| Sirna_060         | <i>C. reticulatum</i>        |                       | 3.2                 | 3.4        | 58                  | 78        | 0.49              | 0.74        | 0.95                   | 1.72        |
| Karab_092         | <i>C. echinospermum</i>      |                       | 2.2                 | 5.6        | 44                  | 76        | 0.6               | 1.43        | 1.26                   | 1.95        |
| Ortan_066         | <i>C. echinospermum</i>      |                       | 5.6                 | 6.2        | 72                  | 82        | 1.06              | 1.43        | 1.37                   | 1.91        |
| Gunas_062         | <i>C. echinospermum</i>      |                       | 4.4                 | 3.6        | 66                  | 80        | 0.82              | 0.98        | 1.29                   | 2.18        |
| Egill_065         | <i>C. reticulatum</i>        |                       | 4.6                 | 7.8        | 78                  | 80        | 1.13              | 1.77        | 1.94                   | 1.82        |
| Kalka_064         | <i>C. reticulatum</i>        |                       | 4.6                 | 6.8        | 82                  | 86        | 1.32              | 1.26        | 2.38                   | 1.59        |
| Besev_079         | <i>C. reticulatum</i>        |                       | 3.8                 | 3.4        | 76                  | 68        | 1.49              | 0.85        | 2.97                   | 1.7         |
| Oyali_084         | <i>C. reticulatum</i>        |                       | 5.8                 | 5.6        | 82                  | 78        | 1.96              | 1.43        | 2.77                   | 1.99        |
| Deste_080         | <i>C. echinospermum</i>      |                       | 4.4                 | 4.6        | 68                  | 76        | 1.8               | 1.3         | 2.78                   | 2.16        |
| Derei_072         | <i>C. reticulatum</i>        |                       | 3.6                 | 5          | 82                  | 82        | 1.27              | 1.21        | 2.94                   | 2.02        |
| Derei_070         | <i>C. reticulatum</i>        |                       | 4.6                 | 6.4        | 78                  | 80        | 1.48              | 1.97        | 2.52                   | 2.46        |
| Bari2_072n2       | <i>C. reticulatum</i>        |                       | 4.6                 | 4.6        | 68                  | 82        | 1.7               | 1.38        | 2.53                   | 2.47        |
| CudiA_152         | <i>C. reticulatum</i>        |                       | 3                   | 2.2        | 58                  | 64        | 1.3               | 0.83        | 2.59                   | 2.42        |
| CudiB_022C        | <i>C. reticulatum</i>        |                       | 6                   | 4.6        | 94                  | 86        | 1.7               | 1.31        | 2.69                   | 2.46        |
| Kayat_077         | <i>C. reticulatum</i>        |                       | 3.8                 | 5.2        | 64                  | 90        | 2.14              | 1.05        | 3.67                   | 1.84        |
| S2Drd_065         | <i>C. echinospermum</i>      |                       | 5.2                 | 6.8        | 70                  | 88        | 2.39              | 1.9         | 3.26                   | 2.45        |
| Cermi_075         | <i>C. echinospermum</i>      |                       | 2.4                 | 4.6        | 58                  | 64        | 1.35              | 1.71        | 3.35                   | 2.37        |
| Bari1_092         | <i>C. reticulatum</i>        |                       | 6                   | 4.6        | 75                  | 84        | 2.46              | 1.51        | 3.08                   | 2.75        |
| Egill_073         | <i>C. reticulatum</i>        |                       | 4.4                 | 5.4        | 76                  | 94        | 1.65              | 1.67        | 2.91                   | 2.93        |
| Kesen_075         | <i>C. reticulatum</i>        |                       | 5.4                 | 4.8        | 78                  | 94        | 2.23              | 1.37        | 3.22                   | 2.7         |
| Sarik_067         | <i>C. reticulatum</i>        |                       | 6                   | 5          | 96                  | 96        | 1.93              | 1.47        | 3.12                   | 2.83        |
| <b>ICC506EB</b>   | <b><i>C. aerietinum</i></b>  | <b>Resistant</b>      | <b>2.6</b>          | <b>3.2</b> | <b>70</b>           | <b>80</b> | <b>1.21</b>       | <b>1.1</b>  | <b>3.33</b>            | <b>2.76</b> |
| <b>IG 72953</b>   | <b><i>C. reticulatum</i></b> | <b>Wild Resistant</b> | <b>3.4</b>          | <b>5.6</b> | <b>68</b>           | <b>94</b> | <b>1.8</b>        | <b>1.5</b>  | <b>3.63</b>            | <b>2.5</b>  |
| Besev_075         | <i>C. reticulatum</i>        |                       | 5.4                 | 2.8        | 86                  | 80        | 1.5               | 1.34        | 2.42                   | 3.85        |
| Bari3_072c        | <i>C. reticulatum</i>        |                       | 5.6                 | 4          | 82                  | 84        | 2.37              | 1.43        | 3.5                    | 3.05        |
| Bari3_106D        | <i>C. reticulatum</i>        |                       | 4.4                 | 2.4        | 70                  | 72        | 1.54              | 1.63        | 2.47                   | 4.91        |
| Bari3_100         | <i>C. reticulatum</i>        |                       | 4.2                 | 4.8        | 76                  | 74        | 2.57              | 1.94        | 4.75                   | 3.02        |
| <b>ICC3137</b>    | <b><i>C. aerietinum</i></b>  | <b>Susceptible</b>    | <b>3.6</b>          | <b>6.4</b> | <b>80</b>           | <b>82</b> | <b>2.58</b>       | <b>2.19</b> | <b>5.8</b>             | <b>2.82</b> |
| Savur_063         | <i>C. reticulatum</i>        |                       | 3.8                 | 5.2        | 68                  | 90        | 2.75              | 2.2         | 4.96                   | 3.8         |
| <b>ICCV 95334</b> | <b><i>C. aerietinum</i></b>  | <b>Susceptible</b>    | <b>3</b>            | <b>4.4</b> | <b>70</b>           | <b>74</b> | <b>1.98</b>       | <b>2.39</b> | <b>4.75</b>            | <b>4.05</b> |

DAE, days after exposure. Green, resistant checks; red, susceptible checks.

**Supplemental Table 9b.** *Helicoverpa armigera* nutritionally complete diet supplementation assay. Green, resistant checks; red, susceptible checks.

| Accession         | Species                      | Remark                | Larval survival on 10 <sup>th</sup> day (%) | Larval survival on 15 <sup>th</sup> day (%) | 10th day larval weight (mg) | 15th day larval weight (mg) | Weight gain (mg) |
|-------------------|------------------------------|-----------------------|---------------------------------------------|---------------------------------------------|-----------------------------|-----------------------------|------------------|
| Sirna_060         | <i>C. reticulatum</i>        |                       | 50                                          | 38                                          | 4                           | 5.3                         | 1.3              |
| Karab_092         | <i>C. echinospermum</i>      |                       | 46                                          | 22                                          | 5.3                         | 7                           | 1.7              |
| Ortan_066         | <i>C. echinospermum</i>      |                       | 62                                          | 54                                          | 10.8                        | 25.6                        | 14.8             |
| Gunas_062         | <i>C. echinospermum</i>      |                       | 54                                          | 50                                          | 11.1                        | 21.1                        | 10.1             |
| Egill_065         | <i>C. reticulatum</i>        |                       | 70                                          | 54                                          | 17.9                        | 38.6                        | 20.6             |
| Kalka_064         | <i>C. reticulatum</i>        |                       | 74                                          | 66                                          | 9.4                         | 19.2                        | 9.9              |
| Besev_079         | <i>C. reticulatum</i>        |                       | 84                                          | 78                                          | 18.2                        | 83.7                        | 65.5             |
| Oyali_084         | <i>C. reticulatum</i>        |                       | 56                                          | 48                                          | 7.8                         | 16                          | 8.2              |
| Deste_080         | <i>C. echinospermum</i>      |                       | 62                                          | 56                                          | 10.5                        | 22.3                        | 11.8             |
| Derei_072         | <i>C. reticulatum</i>        |                       | 70                                          | 58                                          | 8.6                         | 17.2                        | 8.6              |
| Derei_070         | <i>C. reticulatum</i>        |                       | 54                                          | 48                                          | 11                          | 20.9                        | 9.9              |
| Bari2_072n2       | <i>C. reticulatum</i>        |                       | 72                                          | 54                                          | 14.8                        | 45.9                        | 31.1             |
| CudiA_152         | <i>C. reticulatum</i>        |                       | 44                                          | 40                                          | 9.2                         | 14.9                        | 5.7              |
| CudiB_022C        | <i>C. reticulatum</i>        |                       | 60                                          | 44                                          | 10.5                        | 23.6                        | 13               |
| Kayat_077         | <i>C. reticulatum</i>        |                       | 64                                          | 58                                          | 17.1                        | 30.8                        | 13.7             |
| S2Drd_065         | <i>C. echinospermum</i>      |                       | 48                                          | 46                                          | 8.2                         | 13.4                        | 5.2              |
| Cermi_075         | <i>C. echinospermum</i>      |                       | 48                                          | 42                                          | 8.5                         | 13.8                        | 5.3              |
| Bari1_092         | <i>C. reticulatum</i>        |                       | 84                                          | 78                                          | 18.4                        | 85.6                        | 67.2             |
| Egill_073         | <i>C. reticulatum</i>        |                       | 54                                          | 48                                          | 6.5                         | 9                           | 2.5              |
| Kesen_075         | <i>C. reticulatum</i>        |                       | 78                                          | 66                                          | 9.5                         | 22                          | 12.4             |
| Sarik_067         | <i>C. reticulatum</i>        |                       | 74                                          | 68                                          | 10.3                        | 20                          | 9.7              |
| <b>ICC506EB</b>   | <b><i>C. aerietinum</i></b>  | <b>Resistant</b>      | <b>42</b>                                   | <b>34</b>                                   | <b>7.9</b>                  | <b>10.9</b>                 | <b>3</b>         |
| <b>IG 72953</b>   | <b><i>C. reticulatum</i></b> | <b>Wild Resistant</b> | <b>56</b>                                   | <b>54</b>                                   | <b>27.9</b>                 | <b>70.5</b>                 | <b>42.6</b>      |
| Besev_075         | <i>C. reticulatum</i>        |                       | 64                                          | 56                                          | 7.7                         | 13.2                        | 5.5              |
| Bari3_072c        | <i>C. reticulatum</i>        |                       | 42                                          | 42                                          | 9.7                         | 21                          | 11.2             |
| Bari3_106D        | <i>C. reticulatum</i>        |                       | 52                                          | 50                                          | 10.1                        | 20                          | 9.9              |
| Bari3_100         | <i>C. reticulatum</i>        |                       | 78                                          | 70                                          | 20.6                        | 66.2                        | 45.6             |
| <b>ICC3137</b>    | <b><i>C. aerietinum</i></b>  | <b>Susceptible</b>    | <b>94</b>                                   | <b>90</b>                                   | <b>23.1</b>                 | <b>75.1</b>                 | <b>52</b>        |
| Savur_063         | <i>C. reticulatum</i>        |                       | 58                                          | 56                                          | 8.9                         | 21.6                        | 12.8             |
| <b>ICCV 95334</b> | <b><i>C. aerietinum</i></b>  | <b>Susceptible</b>    | <b>86</b>                                   | <b>78</b>                                   | <b>23.9</b>                 | <b>74.6</b>                 | <b>50.7</b>      |

**Supplementary Figure 1.** Photo Montage of collecting and habitats. **a.** and **b.** depict *C. reticulatum* habitat, while **c.** is a *C. echinospermum* habitat. Images contributed by JB Eric von Wettberg.

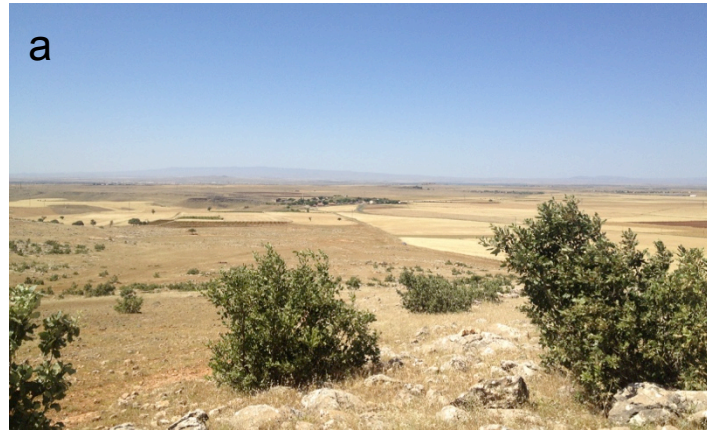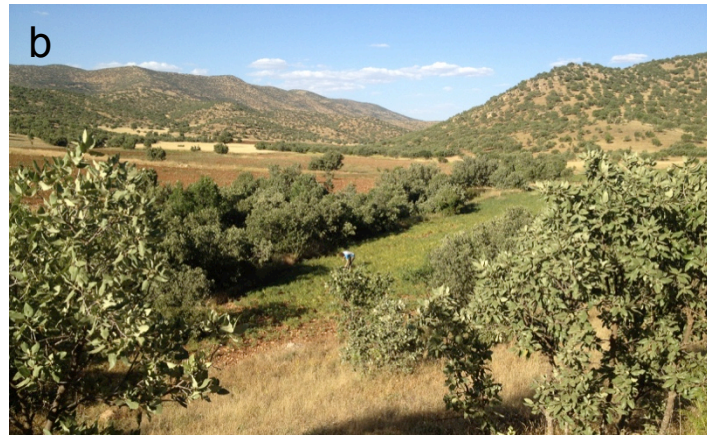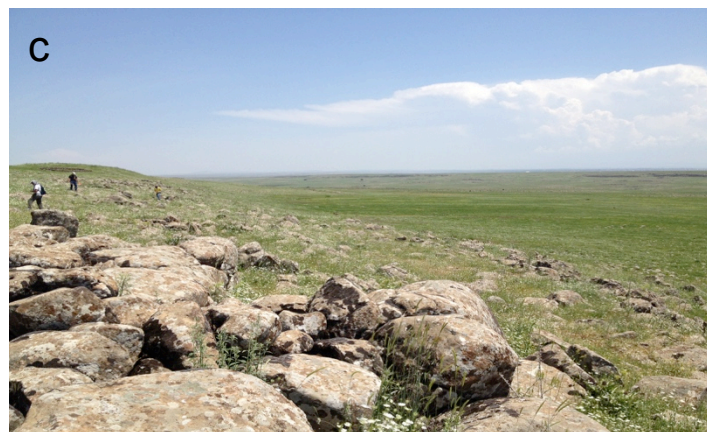

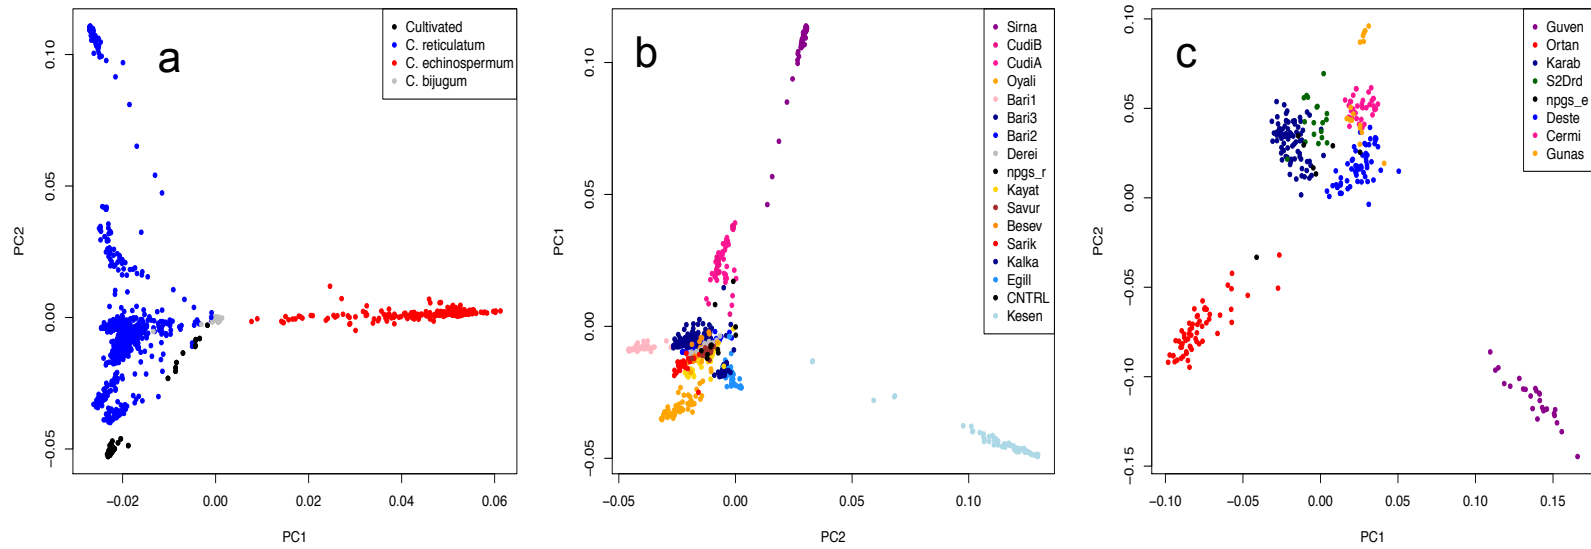

**Supplementary Figure 2.** Principal Coordinate analysis of 16,845 SNPs across 1,064 samples. **a.** Across samples of all three species. **b.** *Cicer reticulatum* samples alone. **c.** *Cicer echinospermum* samples alone.

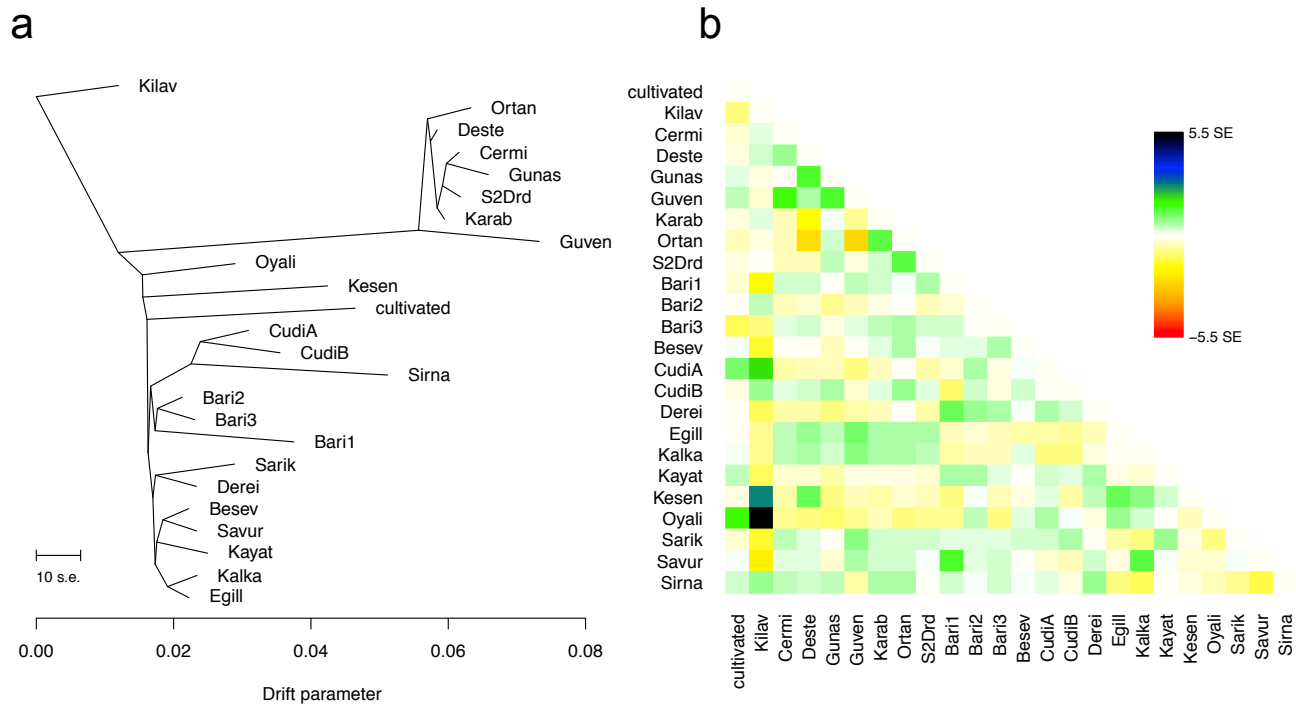

**Supplementary Figure 3.** Population relationships and admixture in *Cicer* species, part 1. **a.** Best fitted maximum likelihood tree displaying relationships between populations with no migration events. Migration edges are colored according to the proportion of source population ancestry found in the sink population. **b.** Plot of residuals for the tree depicted in **a.** The color palette depicts the residual covariance between each pair of populations divided by the average standard error across all pairs.

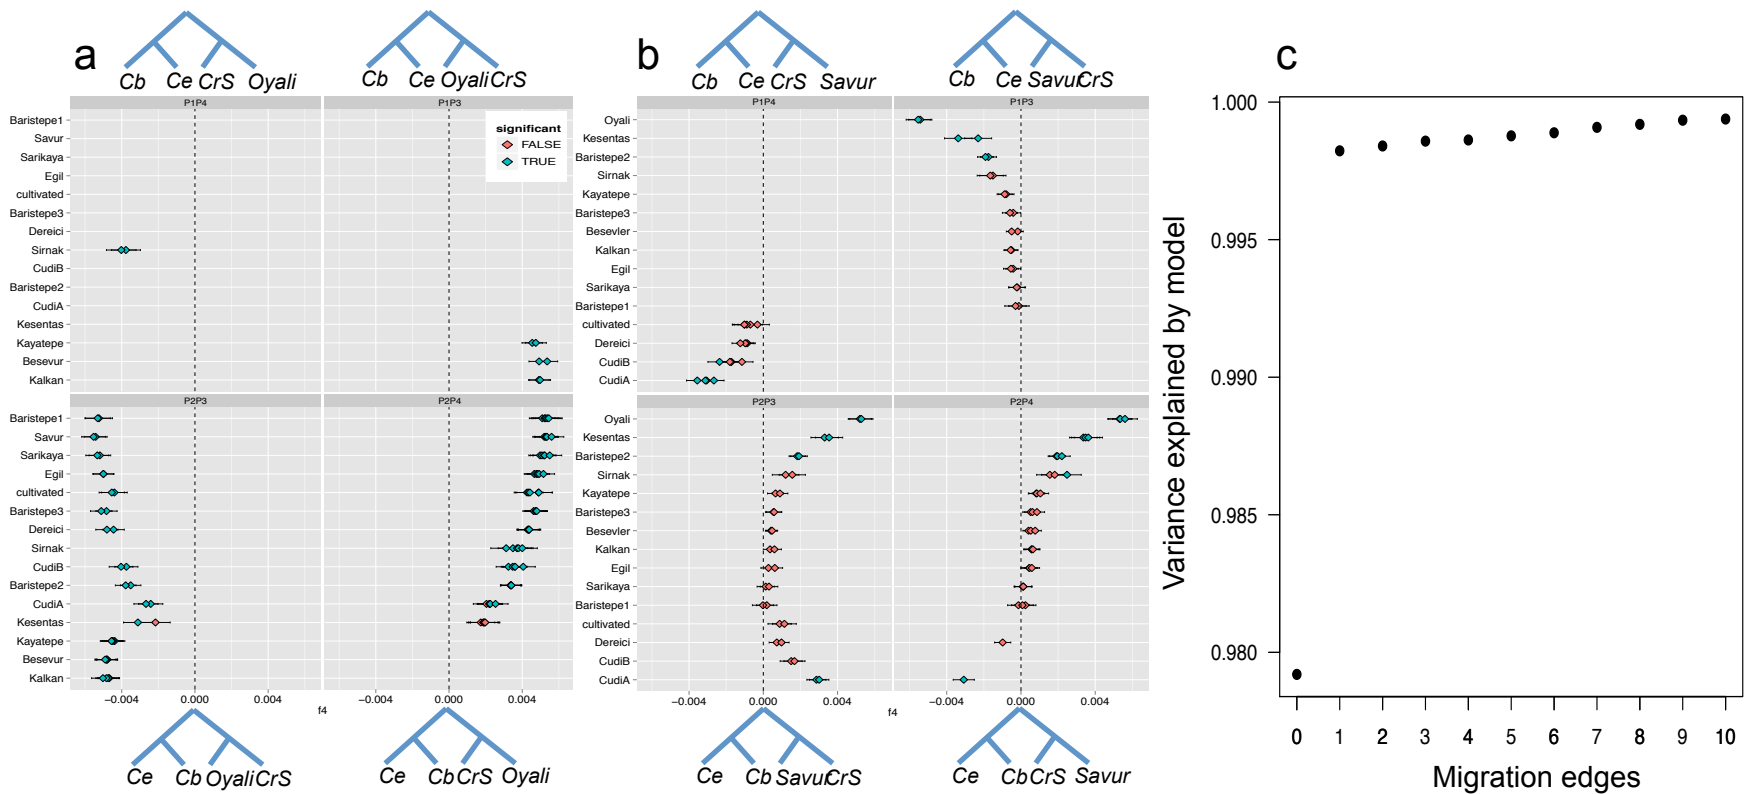

**Supplementary Figure 4.** Population relationships and admixture in *Cicer* species, part 2. The  $f_4$  statistics from four-population tests, testing for gene-flow between **a.** Kilavuz (*C. bijugum*) and Oyalı field sites, and between **b.** Kilavuz and Savur field sites. *Cb*, *C. bijugum*; *Ce*, *C. echinospermum*; *CrS*, *C. reticulatum*. **c.** Proportion of variance in sample covariance matrix that was accounted for by the fitted tree model covariance matrix, with models incorporating 0 through 10 migration events.

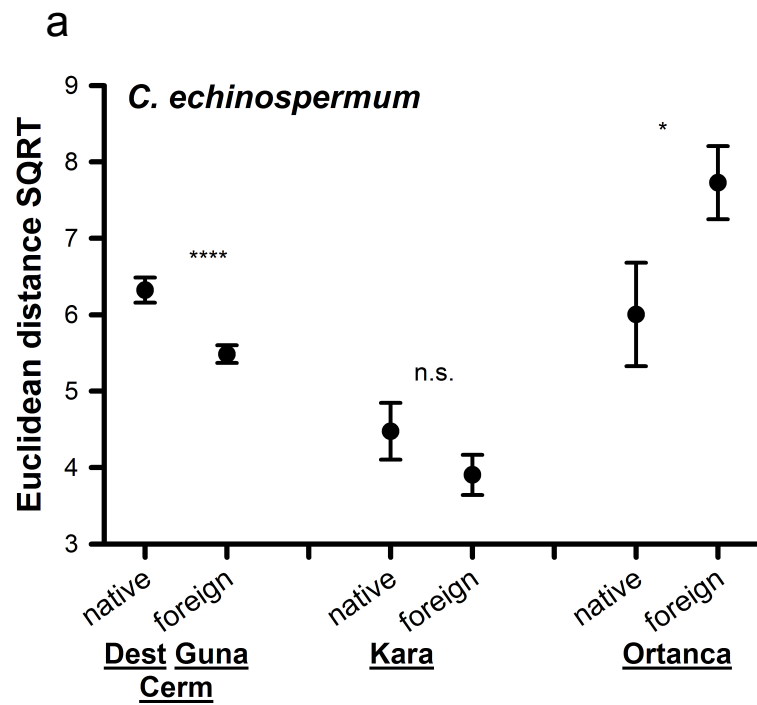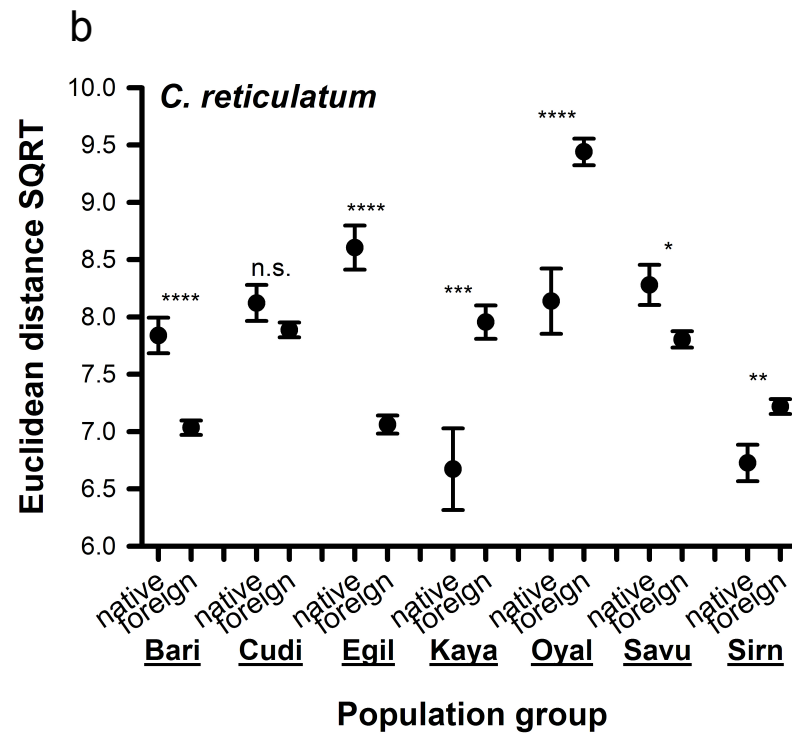

**Supplementary Figure 5.** Euclidean distance between color of seeds and color of soils among STRUCTURE defined populations and field sites, respectively. **a.** *Cicer echinospermum*. **b.** *C. reticulatum*. “Native” indicates the color distance within a field site, and “foreign” the color distance to other field sites.



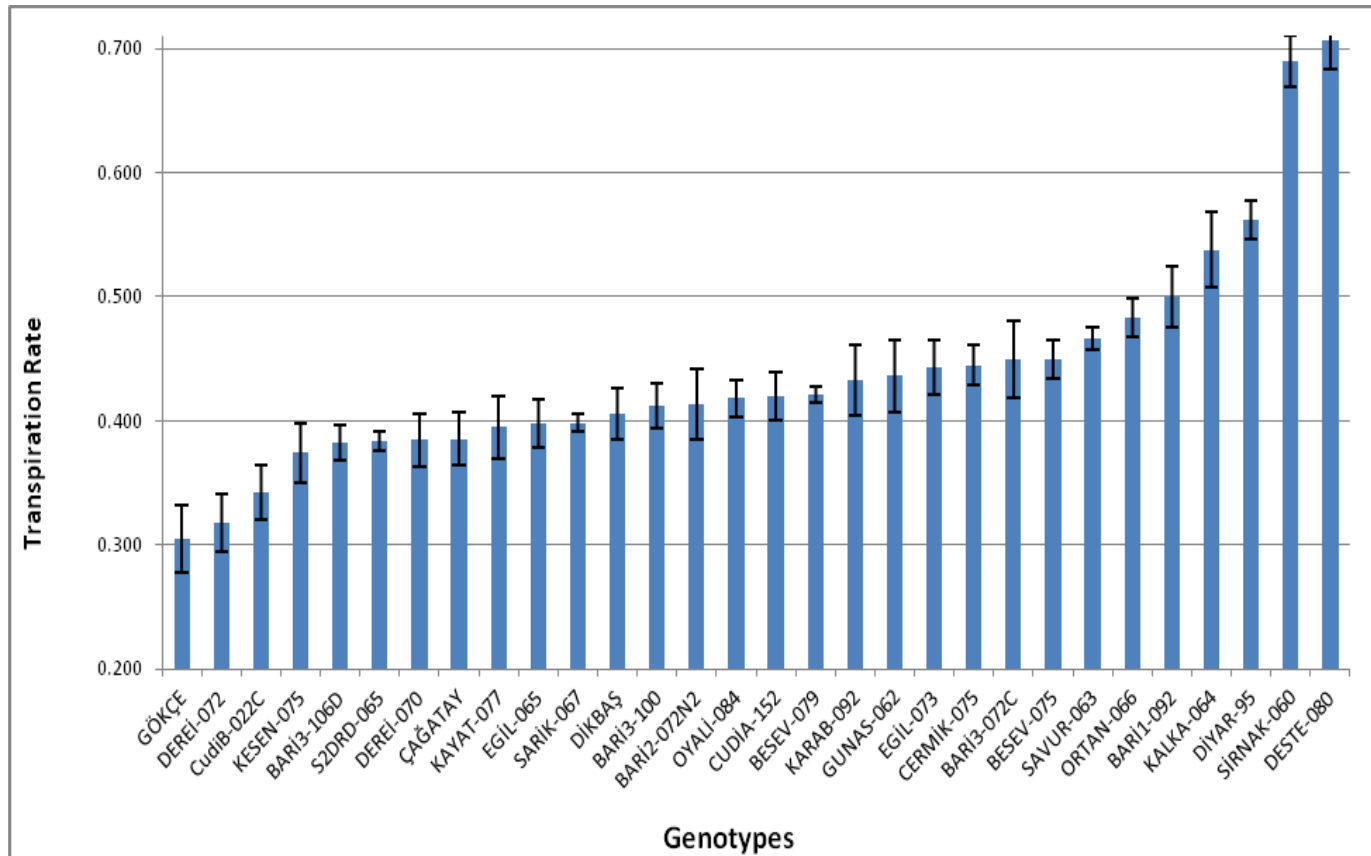

**Supplementary Figure 6.** Transpiration rate of 26 wild Cicer accessions and 4 cultivated chickpea varieties during a day-long VPD experiment. Error bars are standard deviation.

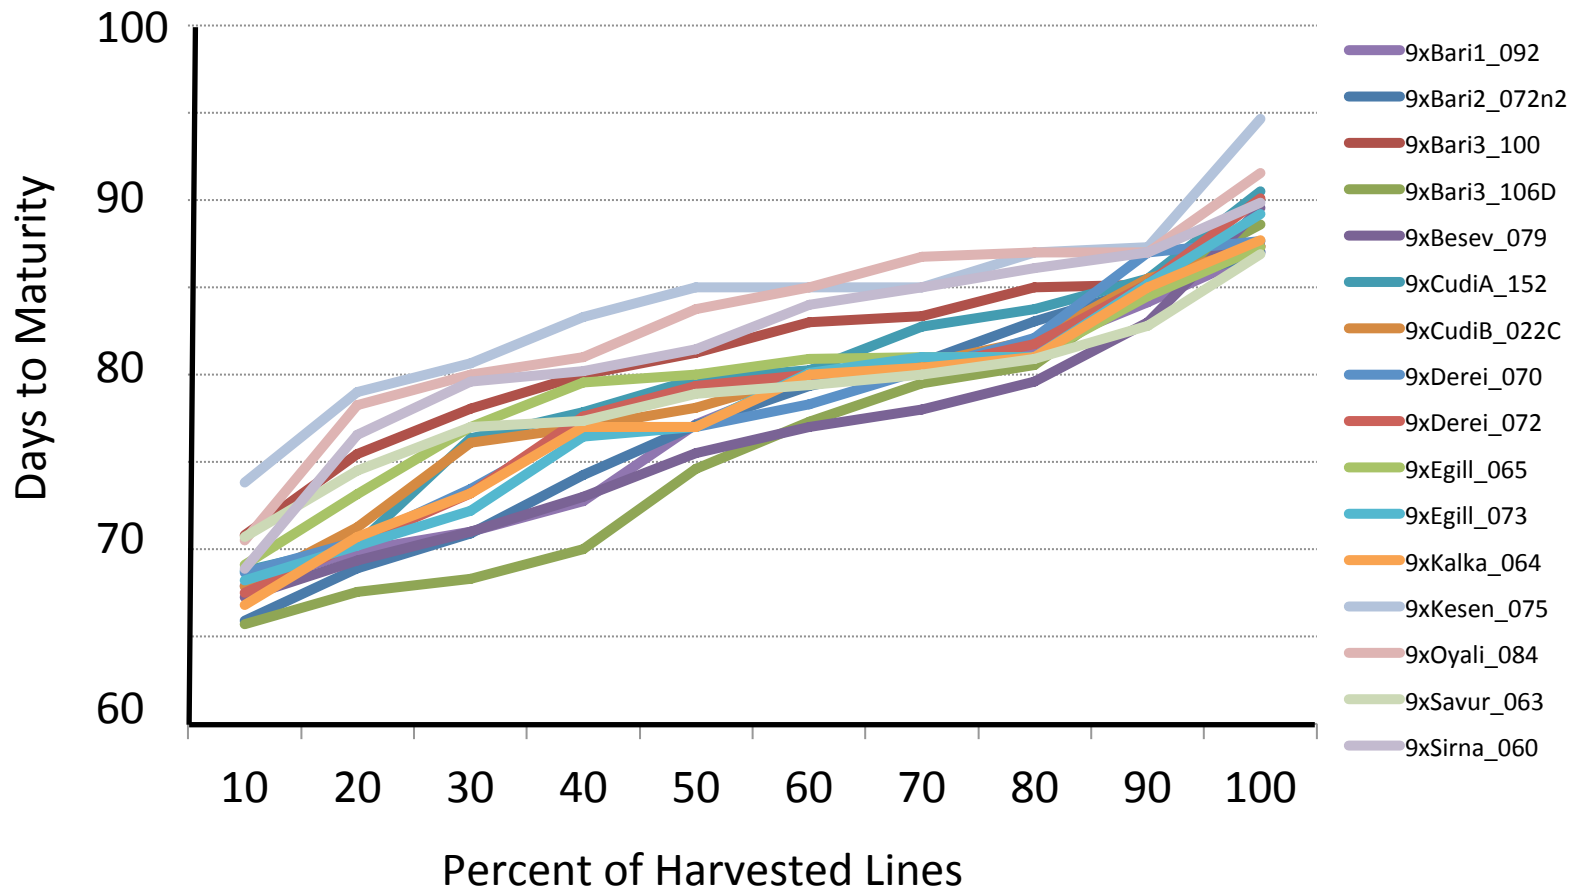

**Supplemental Figure 7.** Segregating maturity time variation in F2 populations. Shown are data for sixteen wild *C. reticulatum* accessions, each crossed into a common cultivated line (ICC 96029). Progeny segregate for an early flowering time locus from ICC 96029 which behaves in a partially dominant manner. Variation in the earliest maturing tail of the distribution reflects the background contribution of wild variation to early flowering imposed by the ICC 96029 allele.

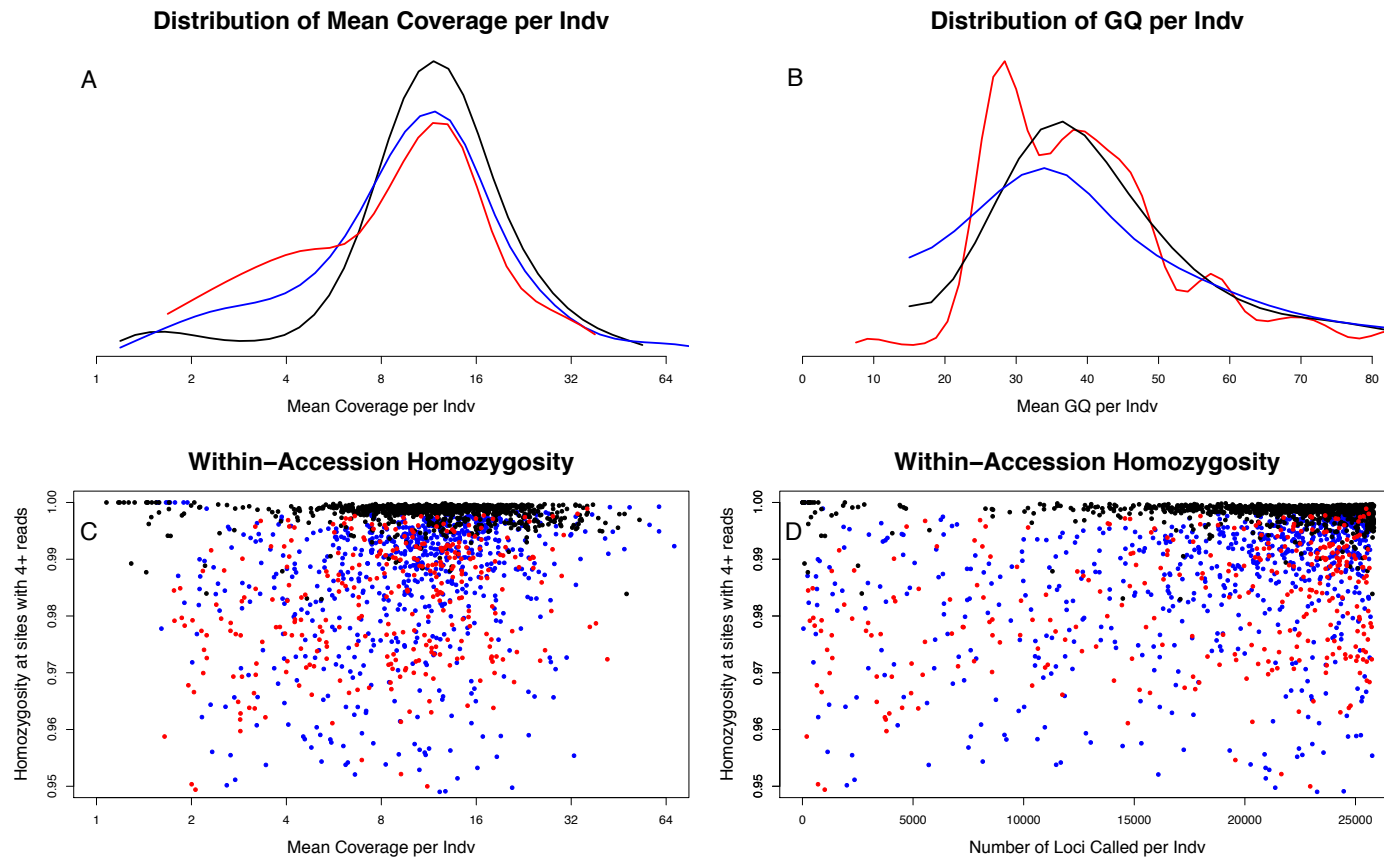

**Supplementary Figure 8.** Mapping summary of genome coverage, genotype quality, and observed homozygosity of GBS data across accessions. *C. arietinum* (black), *C. reticulatum* (blue), and *C. echinospermum* (red). Distributions of per-accession: **a.** mean coverage, and **b.** mean genotype quality across three *Cicer* species. Observed homozygosity calculated independently for all accessions at loci supported by at least four reads are not correlated with **c.** its mean coverage or **d.** the number loci called.
