# Supplementary material for: Ecology and genomics of an important crop wild relative as a prelude to agricultural innovation
Source: PubMed Central journal article supplement (PMC5811434; doi:10.1038/s41467-018-02867-z), 2018-02-13
Supplement: 41467_2018_2867_MOESM2_ESM.pdf [file 41467_2018_2867_MOESM2_ESM.pdf]

## **Description of Additional Supplementary Files**

File Name: Supplementary Data 1

Description: Plant accession metadata.

File Name: Supplementary Data 2

Description: Seed micronutrient analysis.
